# Supplementary material for: Conductive Mg sub-silicate mantles dictate the dynamo of super-Earths
Source: Research Square preprint supplement (doi:10.21203/rs.3.rs-6920303/v1), 2026-01-27
Supplement: Supplementary file 1 [file 0e8d8db24ecd65fb847765bd.docx]

Supplemental Information for “Magnesium sub-silicates in exoplanetary interiors”

Yanlei Geng1,2, Fangfei Li1*, Ho-kwang Mao2, Qingyang Hu1,2*

1. Synergetic Extreme Condition High-Pressure Science Center, State Key Laboratory of High Pressure and Superhard Materials, College of Physics, Jilin University, Changchun, 130012, China

2. Center for High Pressure Science and Technology Advanced Research, Beijing, 100193, China


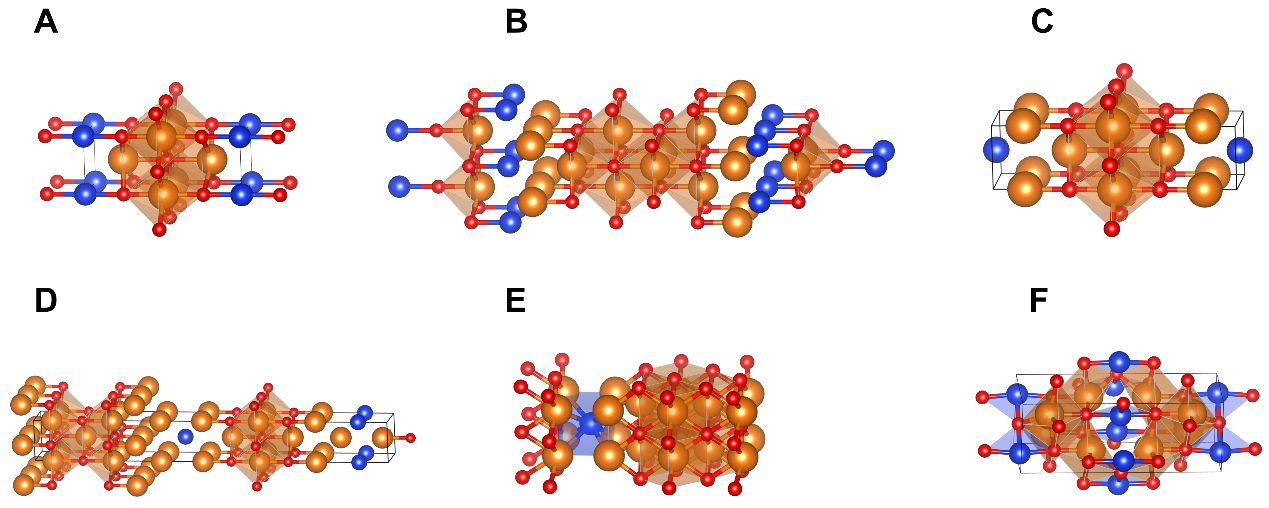


**Fig. S1** The crystal structures of the stable Mg-Si-O compounds at high pressure. **(A)**, *P*4/*mmm* phase for Mg3SiO3, **(B)**, *P*4/*nmm* phase for Mg4SiO3, **(C)**, *P*4/*mmm* phase for Mg5SiO3, **(D)**, *I*4*mm* phase for Mg6SiO3, **(E)**, *Pmm*2 phase for Mg5SiO4, **(F)**, *P*42/*mnm* phase for Mg4Si2O5.


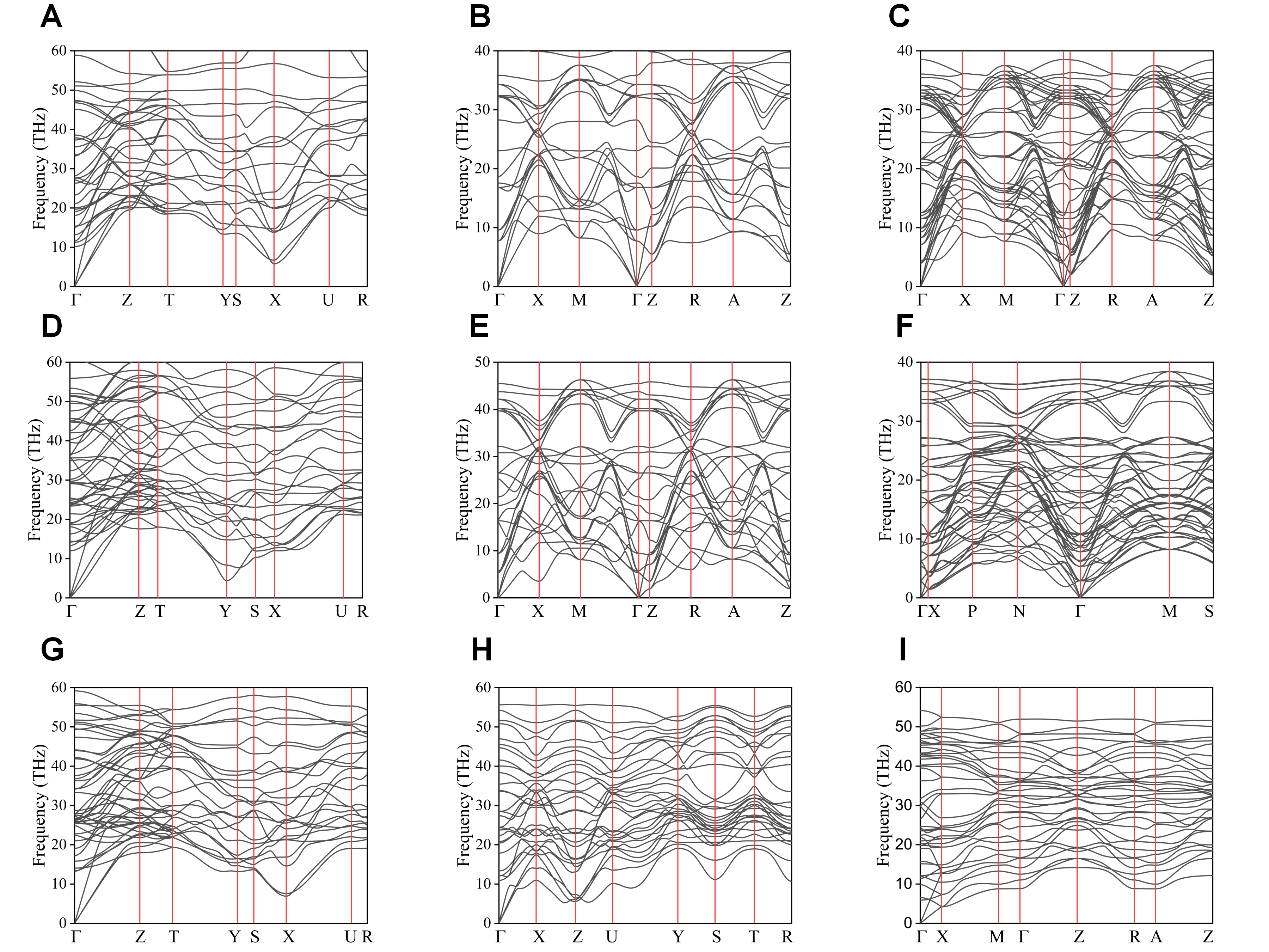


**Fig. S2** The phonon spectrum at the corresponding pressure. **(A)**, *Cmmm* phase for Mg2SiO3 at 1000 GPa, **(B)**, *Cmmm* phase for Mg4SiO3 at 1500 GPa, **(C)**, *P*4/*mmm* phase for Mg3SiO3 at 300 GPa, **(D)**, *P*4/*nmm* phase for Mg4SiO3 at 300 GPa, **(E)**, *P*4/*mmm* phase for Mg5SiO3 at 1000 GPa, **(F)**, *I*4*mm* phase for Mg6SiO3 at 300 GPa, **(G)**, *Cmmm* phase for Mg3SiO4 at 1000 GPa, **(H)**, *Pmm*2 phase for Mg5SiO4 at 1000 GPa, **(I)**, *P*42/*mnm* phase for Mg4Si2O5 at 800 GPa.


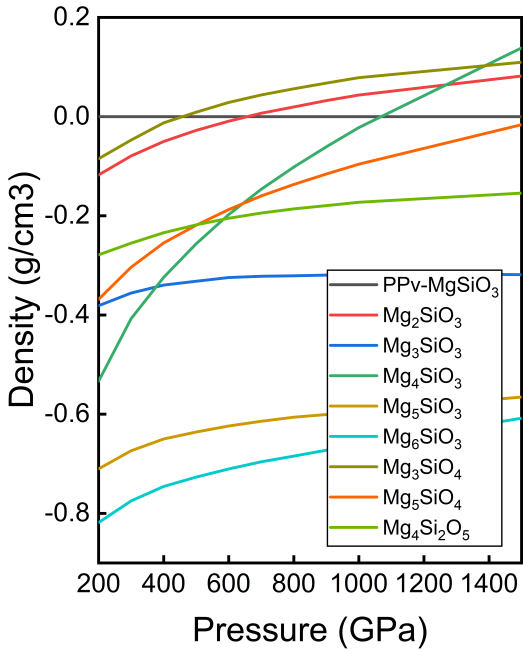


**Fig. S3** The density of several sub-Mg-silicates as a function of pressure.


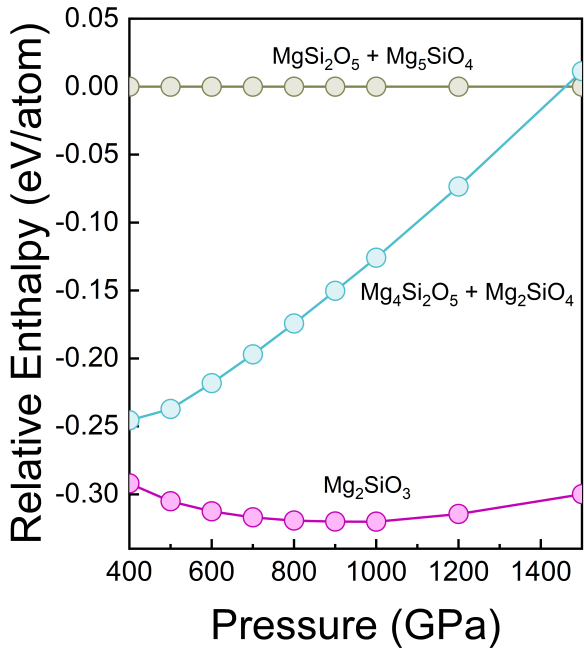


**Fig. S4** Pressure-dependent relative enthalpies of Mg2SiO3 and its aggregation of possible dissociation products. Mg2SiO3 is more stable than combinations such as MgSi2O5 + Mg5SiO4 and Mg4Si2O5 + Mg2SiO4 above 400 GPa.


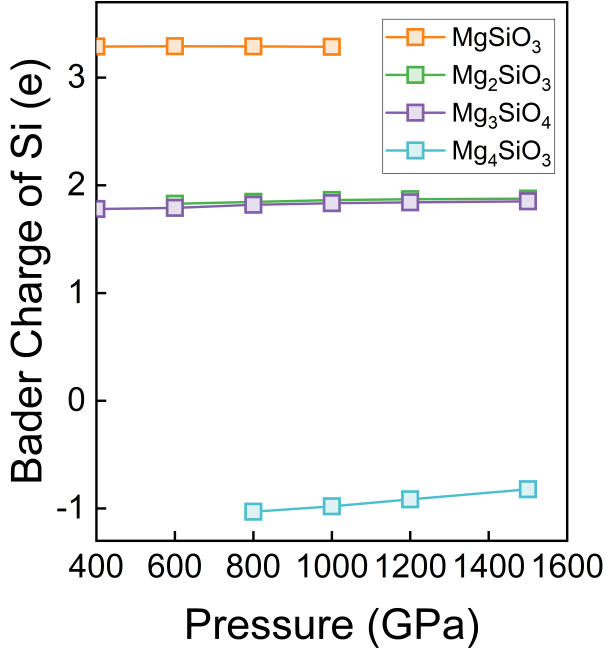


**Fig. S5** Bader charge of Si as a function of pressure in MgSiO3 (PPv phase), Mg2SiO3 (*Cmmm* phase), Mg3SiO4 (*Cmmm* phase), and Mg4SiO3 (*Cmmm* phase).


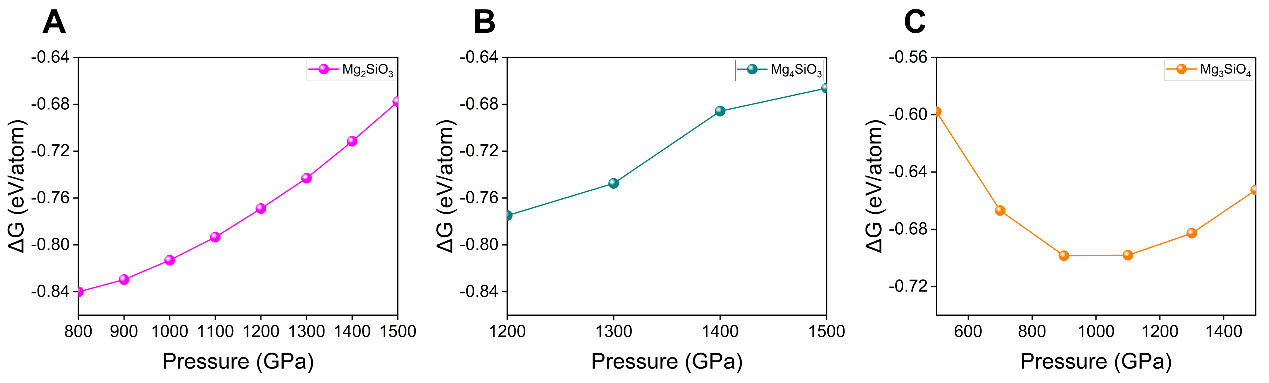


**Fig. S6** Free energy calculation as a function of pressure. **(A)**, Formation Gibbs free energy (Δ*G*) of Mg2SiO3 (*Cmmm* phase) relative to MgSiO3 and Mg at 10000 K. **(B)**, Formation Gibbs free energy (Δ*G*) of Mg4SiO3 (*Cmmm* phase) relative to MgSiO3 and Mg at 10000 K. **(C)**, Formation Gibbs free energy (Δ*G*) of Mg3SiO4 (*Cmmm* phase) relative to Mg2SiO4 and Mg at 10000 K.


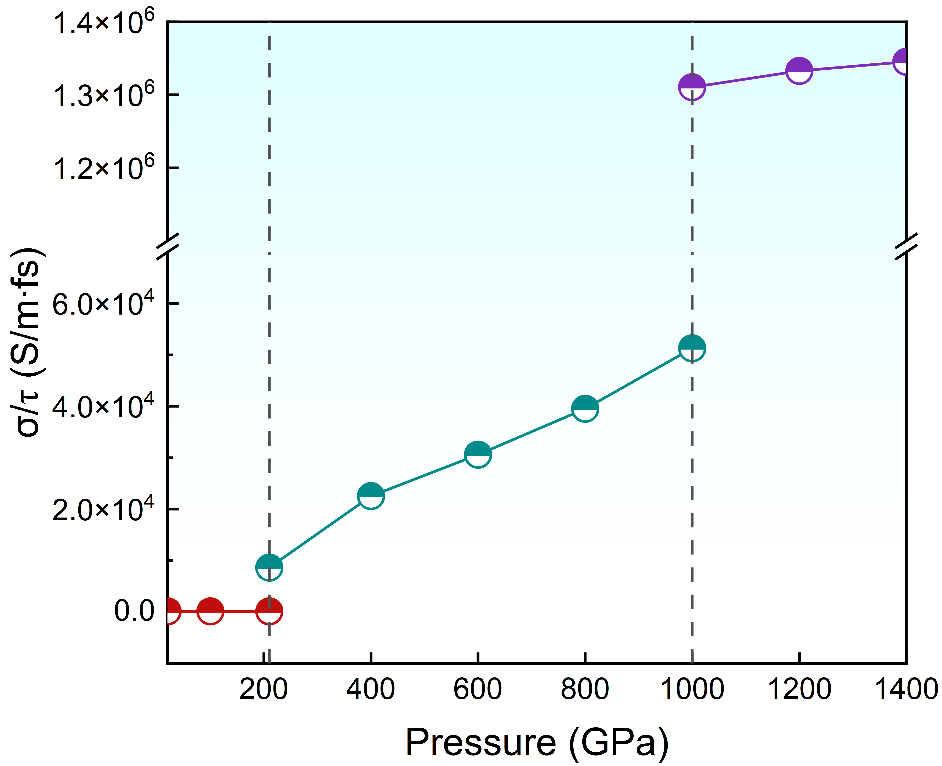


**Fig. S7** Generalized average conductivity curve of silicate mantle, sub-silicate mantle and conductive mantle.


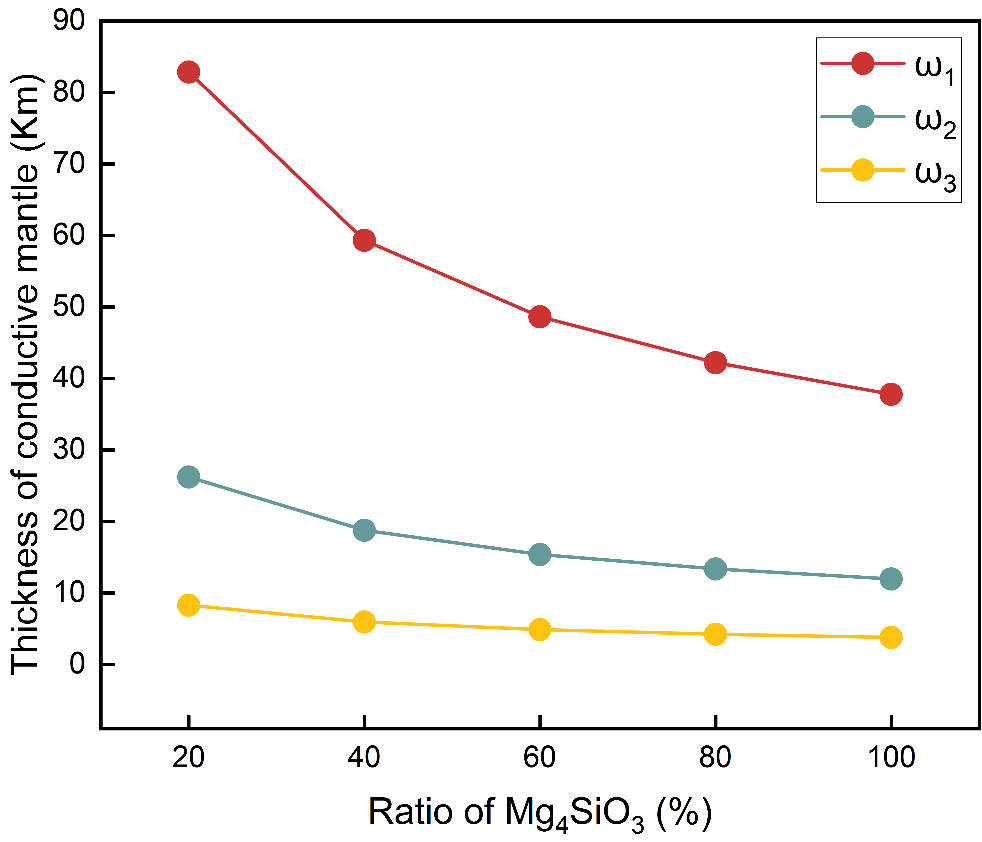


**Fig. S8** Relationship between thickness of conductive mantle layer and Mg4SiO3 fraction in CMB layer. The curves correspond to the angular frequencies (*ω*) of the time-varying magnetic field at 10−8 rad/s, 10−7 rad/s, and 10−6 rad/s, respectively, and illustrate the conditions for achieving > 95% magnetic shielding efficiency.


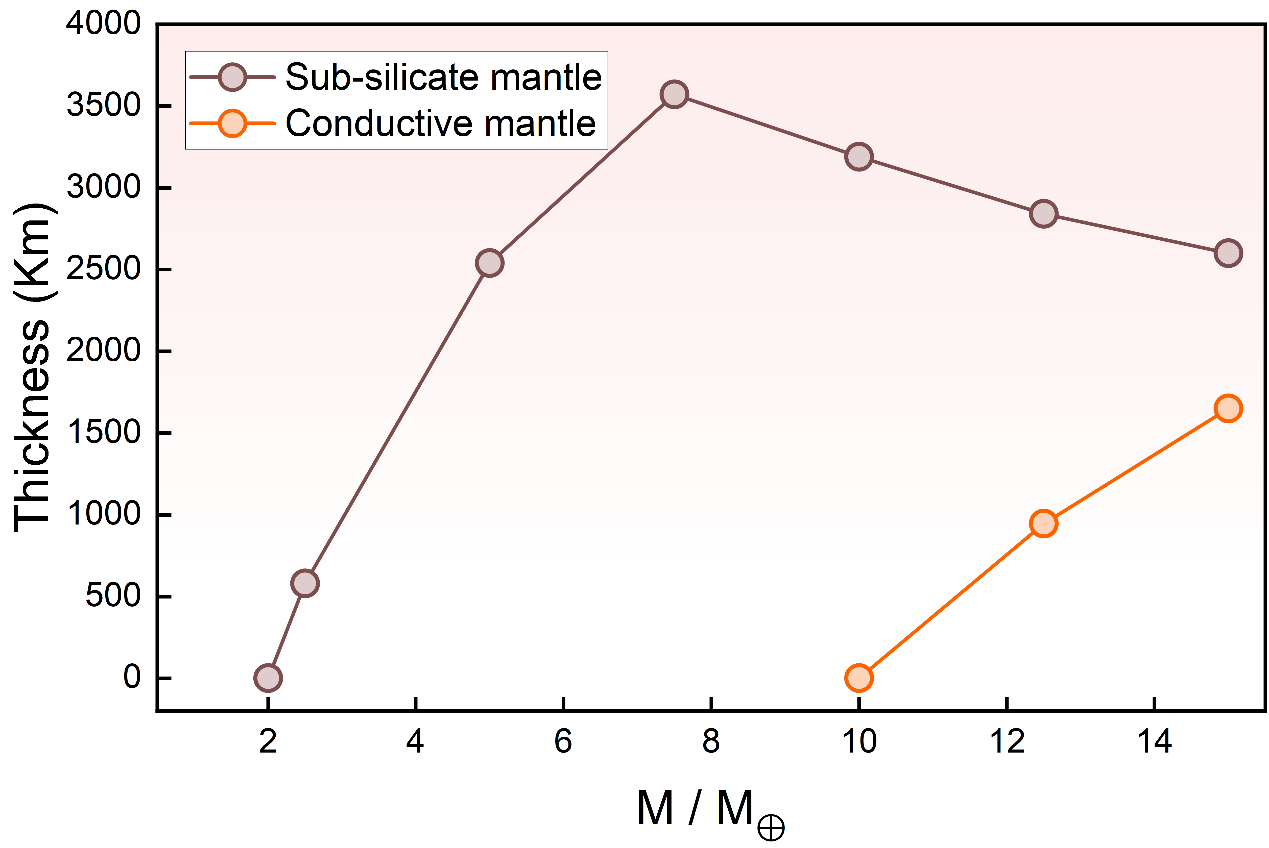


**Fig. S9** Plot of thickness as a function of super-Earth mass (M/M⊕), for sub-silicate mantle (purple dots) and conductive mantle layer (orange dots), respectively.


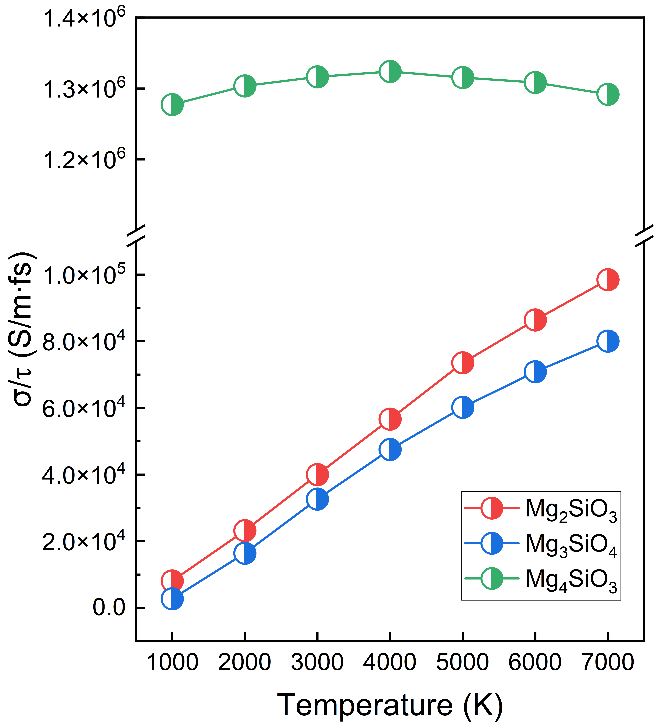


**Fig. S10** Generalized average conductivity curve of Mg2SiO3 (*Cmmm* phase), Mg3SiO4 (*Cmmm* phase), and Mg4SiO3 (*Cmmm* phase) with temperature varying from 1000 K to 7000 K under a pressure of 1000 GPa.

**Table**

**Table S1** The parameters of predicted structures.

| Space group | Pressure  (GPa) | Lattice parameter  (Å) | | Atom site | | Wyckoff position | | |
| --- | --- | --- | --- | --- | --- | --- | --- | --- |
| Mg2SiO3  (*Cmmm*) | 1000 | *a*=2.8067  *b*=8.2251  *c*=1.9299 | *α*=90.00  *β*=90.00  *γ*=90.00 | Mg  Si  O1  O2 | 4i  2d  4j  2c | 0.0000  0.0000  0.0000  0.5000 | 0.3399  0.0000  0.1768  0.0000 | 0.0000  0.5000  0.5000  0.5000 |
| Mg3SiO3  (*P*4/*mmm*) | 300 | *a*=2.4550  *b*=2.4550  *c*=6.5844 | *α*=90.00  *β*=90.00  *γ*=90.00 | Mg1  Mg2  Si  O1  O2 | 2h  1b  1a  2g  1d | 0.5000  0.0000  0.0000  0.0000  0.5000 | 0.5000  0.0000  0.0000  0.0000  0.5000 | 0.2164  0.5000  0.0000  0.2455  0.5000 |
| Mg4SiO3  (*P*4/*nmm*) | 300 | *a*=2.4593  *b*=2.4593  *c*=15.6632 | *α*=90.00  *β*=90.00  *γ*=90.00 | Mg1  Mg2  Mg3  Mg4  Si  O1  O2 | 2c  2c  2c  2c  2c  2c  2c | 0.0000  0.0000  0.5000  0.5000  0.5000  0.5000  0.5000 | 0.5000  0.5000  0.0000  0.0000  0.0000  0.0000  0.0000 | 0.2280  0.4458  0.3281  0.9362  0.1547  0.0485  0.6642 |
| Mg4SiO3  (*Cmmm*) | 1500 | *a*=6.6533  *b*=4.4014  *c*=1.8366 | *α*=90.00  *β*=90.00  *γ*=90.00 | Mg  Si  O1  O2 | 8p  2d  4h  2c | 0.1371  0.0000  0.2201  0.0000 | 0.2934  0.0000  0.0000  0.5000 | 0.0000  0.5000  0.5000  0.5000 |
| Mg5SiO3  (*P*4/*mmm*) | 500 | *a*=2.3293  *b*=2.3293  *c*=8.7693 | *α*=90.00  *β*=90.00  *γ*=90.00 | Mg1  Mg2  Mg3  Si  O1  O2 | 2g  1b  2h  1c  2g  1d | 0.0000  0.0000  0.5000  0.5000  0.0000  0.5000 | 0.0000  0.0000  0.5000  0.5000  0.0000  0.5000 | 0.8686  0.5000  0.3009  0.0000  0.3148  0.5000 |
| Mg6SiO3  (*I*4*mm*) | 300 | *a*=2.4427  *b*=2.4427  *c*=21.2432 | *α*=90.00  *β*=90.00  *γ*=90.00 | Mg1  Mg2  Mg3  Mg4  Mg5  Mg6  Si  O1  O2  O3 | 2a  2a  2a  2a  2a  2a  2a  2a  2a  2a | 0.5000  0.5000  0.5000  0.0000  0.0000  0.0000  0.0000  0.5000  0.5000  0.0000 | 0.5000  0.5000  0.5000  0.0000  0.0000  0.0000  0.0000  0.5000  0.5000  0.0000 | 0.1365  0.9762  0.8580  0.7969  0.0513  0.2221  0.9182  0.2169  0.0556  0.1363 |
| Mg3SiO4  (*Cmmm*) | 1000 | *a*=3.9044  *b*=7.7477  *c*=1.9415 | *α*=90.00  *β*=90.00  *γ*=90.00 | Mg1  Mg2  Si  O | 4j  2c  2a  8p | 0.5000  0.5000  0.0000  0.7316 | 0.2624  0.0000  0.0000  0.1309 | 0.5000  0.5000  0.0000  0.0000 |
| Mg5SiO4  (*Pmm*2) | 1000 | *a*=2.6696  *b*=1.9164  *c*=7.5720 | *α*=90.00  *β*=90.00  *γ*=90.00 | Mg1  Mg2  Mg3  Mg4  Mg5  Si  O1  O2  O3  O4 | 1a  1a  1a  1c  1c  1d  1d  1d  1b  1b | 0.0000  0.0000  0.0000  0.5000  0.5000  0.5000  0.5000  0.5000  0.0000  0.0000 | 0.0000  0.0000  0.0000  0.0000  0.0000  0.5000  0.5000  0.5000  0.5000  0.5000 | 0.2674  0.6156  0.9895  0.7891  0.4232  0.1534  0.6083  0.9640  0.4354  0.7973 |
| Mg4Si2O5  (*P*42/*mnm*) | 800 | *a*=3.2468  *b*=3.2468  *c*=8.7027 | *α*=90.00  *β*=90.00  *γ*=90.00 | Mg1  Si1  O1  O2 | 8j  4g  8j  2b | 0.7309  0.8000  0.2709  0.0000 | 0.7309  0.2000  0.2709  0.0000 | 0.8556  0.0000  0.6738  0.5000 |
